# Supplementary material
Source: MDPI journal article supplement (https://www.mdpi.com/2077-1312/9/1/40)
Supplement: s1 [file s1]

## Sheet: Sheet1
Table S1. Measurements performed on the different sea level indicators and the method used for each site.
Site code	Year	1st measurement	2nd measurement	3rd measurement	4th measurement	5th measurement	6th measurement	7th measurement	8th measurement	9th measurement	10th measurement	Average	paper	Method	Standard deviation	Standard error
SA1	2015	-5	-6	-5	-6	-5	-6	-5	-5	-6	-5	-5.4	-5	folding meter	0.516398	0.163299
	2015	-79	-79	-81	-80	-81	-79	-79	-79	-80	-80	-79.7	-80	folding meter	0.823273	0.260342
	2015	-250	-260	-250	-260	-250	-250					-253.333	-250	wrist depth gauge	5.16398	1.63299
SA1	2020	17	17	18	19	19	18	17	18	19	18	18	18	folding meter	0.816497	0.258199
SA9	2015	-19	-19	-20	-20	-21	-19	-19	-21	-20	-20	-19.8	-20	folding meter	0.788811	0.249444
	2015	-116	-114	-115	-115	-114	-114	-114	-115	-115	-116	-114.8	-115	folding meter	0.788811	0.249444
SA9	2020	-21	-20	-22	-22	-21	-22	-21	-22	-21	-22	-21.4	-21	folding meter	0.699206	0.221108
	2020	-119	-119	-120	-121	-121	-120	-119	-120	-119	-119	-119.7	-120	folding meter	0.823273	0.260342
SA10	2015	-29	-31	-30	-29	-31	-30	-29	-30	-31	-29	-29.9	-30	folding meter	0.875595	0.276887
SA10	2020	-18	-17	-17	-18	-17	-16	-17	-18	-16	-16	-17	-17	folding meter	0.816497	0.258199
SA15	2015	-40	-39	-39	-40	-41	-39	-40	-40	-40	-39	-39.7	-40	folding meter	0.674949	0.213437
SA15	2020	-32	-31	-31	-32	-32	-31	-33	-32	-32	-32	-31.8	-32	folding meter	0.632456	0.2
SA16	2020	21.879										22	22	DGPS‐GNSS
SA16	2020	22	23	22	23	22	21	22	21	23	22	22.1		folding meter	0.737865	0.233333
SA18	2020	20.079										20	20	DGPS‐GNSS
SA18	2020	21	19	19	19	20	20	21	20	19	21	19.9		folding meter	0.875595	0.276887
SA19	2020	20.056										20	20	DGPS‐GNSS
SA21	2020	82.021										82	82	DGPS‐GNSS
	2020	131.889										132	132	DGPS‐GNSS
	2020	232.022										232	232	DGPS‐GNSS
SA24	2020	22	23	22	21	21	23	21	22	22	21	21.8	22	folding meter	0.788811	0.249444
SA25	2020	89	87	88	87	87	88	87	87	88	89	87.7	88	folding meter	0.823273	0.260342
	2020	111	112	111	112	113	110	110	111	111	112	111.3	111	folding meter	0.948683	0.3
SA26	2020	35	35	36	34	35	35	37	36	35	36	35.4	35	folding meter	0.843274	0.266667
SA27	2020	14.986										14.986	15	DGPS‐GNSS
SA28	2020	12.982										12.982	15	DGPS‐GNSS
